1 Genomic Analysis of Hypoxia Inducible Factor Alpha Evolution in Ray-finned Fishes

2 (Actinopterygii)

3

4 Ian K. Townley<sup>1</sup> and Bernard B. Rees<sup>2</sup>

5

6 <sup>1</sup>Department of Cell and Molecular Biology

7 Tulane University

8 New Orleans, LA 70118

9

10 <sup>2</sup>Department of Biological Sciences

11 University of New Orleans

12 New Orleans, LA 70148

13

14 Corresponding author: Bernard B. Rees, [brees@uno.edu](mailto:brees@uno.edu)

15

16

17 Significance statement: Vertebrate animals have multiple copies of the hypoxia inducible

18 transcription factor, a critical regulator of oxygen-dependent gene expression, but the number of

19 copies in fishes and their relationships are incompletely understood. This study mines the

20 genomes of ray-finned fishes, finds evidence of gene duplicates not previously appreciated, and

21 clarifies the relationships among duplicates that arose early in vertebrate evolution and those

22 arising from later rounds of genome duplication in fishes.

23 Abstract: Two rounds of genome duplication (GD) in the ancestor of vertebrates, followed by  
24 additional GD during the evolution of ray-finned fishes (Actinopterygii), expanded certain gene  
25 families, including those encoding the hypoxia inducible transcription factor (HIF). The present  
26 study analyzed Actinopterygian genomes for duplicates of HIF $\alpha$ , the subunit that confers  
27 oxygen-dependent gene regulation. In contrast to tetrapod vertebrates that retain three HIF $\alpha$   
28 genes from the ancestral vertebrate GD, four HIF $\alpha$  forms were found in the genomes of primitive  
29 Actinopterygians (spotted gar and Asian arowana). All four forms have been retained in  
30 zebrafish and related species (Otocephala) and salmonids and their sister taxa (northern pike) but  
31 one of them (HIF4 $\alpha$ ) was lost during the evolution of more derived fishes (Neoteleostei). In  
32 addition, the current analyses confirm that Otocephala retain duplicates of HIF1 $\alpha$  and HIF2 $\alpha$   
33 from the teleost-specific GD, provide new evidence of salmonid-specific duplicates of HIF1 $\alpha$ ,  
34 HIF2 $\alpha$ , and HIF3 $\alpha$ , and reveal a broad distribution of a truncated form of HIF2 $\alpha$  in salmonids  
35 and Neoteleostei. This study delivers a comprehensive view of HIF $\alpha$  evolution in the ray-finned  
36 fishes, highlights the need for a consistent nomenclature, and suggests avenues for future  
37 research on this critical transcription factor.

38

39

40

41

42

43 Keywords: genome duplication, ohnolog, phylogenetic analysis, shared synteny, teleost

44 evolution, transcription factor

45 Introduction

46 Species richness and ecological diversity of the teleost fishes have been attributed, in part, to the  
47 evolutionary potential that ensued from multiple genome duplication (GD) events that occurred  
48 during the evolution of this group (Volff 2005; Glasauer and Neuhauss 2014; Guo 2017; Ravi  
49 and Venkatesh 2018). Two GD occurred at the base of vertebrate evolution (Ohno 1970; Dehal  
50 and Boore 2005; Sacerdot et al. 2018), and the evolution of ray-finned fishes (Actinopterygii),  
51 which comprise about half of the extant species of vertebrate animals, has been characterized by  
52 additional GD: the teleost-specific genome duplication (TGD) occurred early in the evolution of  
53 teleost fishes (Postlethwait et al. 2000; Volff 2005; Pasquier et al. 2016; Ravi and Venkatesh  
54 2018) and a more recent GD occurred during the evolution of salmonids (SGD) (Berthelot et al.  
55 2014; Macqueen and Johnston 2014). Although the most common fate of gene duplication is  
56 silencing of one copy (nonfunctionalization) (Lynch and Conery 2000; Inoue et al. 2015), a  
57 considerable number of duplicates can be maintained by acquiring a new function  
58 (neofunctionalization) or by sharing the roles, developmental timing, or tissue specificity of the  
59 ancestral gene (subfunctionalization) (Force et al. 1999). Indeed, genomic analyses of teleost  
60 fishes shows a high proportion of gene duplicates have been maintained in certain species (e.g.,  
61 up to 48% in rainbow trout; Berthelot et al. 2014).

62 The hypoxia-inducible factor (HIF) orchestrates cellular responses to low oxygen in  
63 animals (Kaelin and Ratcliffe 2008; Semenza 2011). The active transcription factor is composed  
64 of an oxygen-dependent alpha subunit (HIF $\alpha$ ) and a constitutively expressed beta subunit (HIF $\beta$ ),  
65 also known as the aryl hydrocarbon receptor nuclear translocator (ARNT), both of which belong  
66 to the large family of PAS-domain proteins, so named for conserved domains present in the  
67 transcription factors Period, ARNT, and Single-minded (Gu et al. 2000; McIntosh et al. 2010).

68 Tetrapod vertebrates, including humans, have three forms of HIF $\alpha$  encoded by the *HIF1A*,  
69 *HIF2A*, and *HIF3A* loci (see Box 1, Supplementary Material online)(Kaelin and Ratcliffe 2008;  
70 Semenza 2011; Duan 2016). Previous analyses of HIF $\alpha$  evolution among fishes suggested that  
71 most teleost fishes have three forms, which appear to be orthologs of the forms found in  
72 tetrapods (Nikinmaa and Rees 2005; Rytönen et al. 2011; Rytönen et al. 2013; Townley et al.  
73 2017). However, zebrafish and relatives (*Cyprinidae*) possess six forms and some non-cyprinid  
74 species retain a truncated form of HIF2 $\alpha$  (Rytönen et al. 2013; Graham and Presnell 2017;  
75 Townley et al. 2017). Rytönen et al. (2013, 2014) provided evidence that the six forms in  
76 *Cyprinidae* arose from the TGD and were maintained in this lineage by subfunctionalization,  
77 whereas they were lost, or dramatically truncated, in other lineages.

78 Here, we reexamined the evolution of HIF $\alpha$  in ray-finned fishes using recently sequenced  
79 genomes, including that of spotted gar (*Lepiosteus oculatus*) to represent a lineage that diverged  
80 prior to the TGD (Braasch et al. 2016). Specifically, we sought to determine (1) whether any ray-  
81 finned fishes retained the four HIF $\alpha$  genes that arose during the two rounds of GD at the base of  
82 vertebrate evolution, (2) whether gene duplicates arising from the TGD are seen in fishes other  
83 than the *Cyprinidae*, (3) whether HIF $\alpha$  duplicates from the SGD are present in salmonid  
84 genomes, and (4) the phylogenetic relationship and distribution of shortened forms of HIF2 $\alpha$ .

85

## 86 Methods

87 Actinopterygian genomes at NCBI (<https://www.ncbi.nlm.nih.gov>) or Ensemble  
88 (<http://www.ensembl.org/>) were searched for HIF $\alpha$  genes through June 2020. The corresponding  
89 coding sequences (CDS) were checked to ensure each was complete and, when multiple CDSs  
90 were available for a single locus, the longest sequence was retained. The final sequence list was

91 curated to avoid overrepresentation of Neoteleostei and to remove sequences with poor  
92 chromosomal or linkage group assignment (supplementary table S1, Supplementary Material  
93 online).

94 Multiple sequence alignments (MSA) were made using MAFFT version 7.123b (Katoh  
95 and Standley 2013; Katoh and Standley 2016) implemented through the GUIDENCE2 server  
96 with Max-iterate of 20 (<http://guidance.tau.ac.il/ver2/>). For phylogenetic analysis, we used the  
97 MSA with the default column cutoff of below 0.93 (Penn et al. 2010; Sela et al. 2015). Bayesian  
98 analyses were performed in BEAST 2 v2.6.1 (<https://www.beast2.org/>) applying an uncorrelated  
99 log normal relaxed molecular clock model (Drummond et al. 2006), a Yule model prior, with  
100 10,000,000 chain-length and 100,000 burn-in (Drummond et al. 2012; Bouckaert et al. 2014).  
101 Nucleotide analysis employed a general time reversible codon substitution model allowing for  
102 invariants and six gamma categories (GTR+I+G). Amino acid analysis employed a JTT matrix-  
103 based model (Jones et al. 1992) allowing for invariants and six gamma categories. The maximum  
104 clade credibility tree was selected using TreeAnnotator v2.6.0. Maximum likelihood analyses  
105 were performed using MEGAX v10.1.8 (Kumar et al. 2018) with 100 bootstrap replicates  
106 (Felsenstein 1985) under the same conditions used in Bayesian analyses. The trees with the  
107 highest log likelihood were visualized and edited in FigTree v1.4.4  
108 (<http://tree.bio.ed.ac.uk/software/figtree/>).

109 Shared synteny among representative species was assessed by determining the flanking  
110 deduced open reading frames (ORF) using the NCBI Graphical Sequence Viewer (v3.38.0). If a  
111 putative ORF lacked a clear identification, BLASTP was used to compare the deduced protein  
112 sequence against Actinopterygii. A small number of putative ORFs could not be identified and  
113 were kept in the analysis as “unknowns”. For genes lacking an abbreviation at NCBI, the gene

114 name was used in a search of UniprotKB (<https://www.uniprot.org>), and the corresponding  
115 abbreviation was used.

116 The N-and C- terminal oxygen-dependent degradation domains (NODD and CODD) and  
117 the C-terminal asparaginyl hydroxylation motif (CEVN) were identified from multiple sequence  
118 alignments in Jalview v2.10.5 (Waterhouse et al. 2009). The NODD and CODD included the  
119 canonical LxxLAP sequence targeted by prolyl hydroxylases and adjacent residues known to  
120 play a role in oxygen-dependent regulation of HIF $\alpha$  (Tarade et al. 2019). Consensus sequences  
121 were made using the Skylign server (<http://skylign.org/>) (Wheeler et al. 2014).

122

## 123 Results and Discussion

124 Phylogenetic analyses of 114 putative HIF $\alpha$  homologs from 22 species in 14 orders of  
125 Actinopterygii (supplementary table S1, Supplementary Material online) resolved four distinct  
126 homology groups (fig. 1). This pattern was strongly supported by Bayesian analyses of  
127 nucleotide and deduced amino acid sequences (posterior probabilities  $\geq 0.89$ ; supplementary  
128 figs. S1, S3, Supplementary Material online), as well as by maximum likelihood (bootstrap  
129 values  $\geq 0.71$  for nucleotide analyses and  $\geq 0.79$  for amino acid analyses; supplementary figs.  
130 S2, S4, Supplementary Material online). The branching patterns of species within each  
131 homology group generally reflected the known phylogeny of fishes (Hughes et al. 2018),  
132 although the relationship of paralogs varied among analyses (see below).

133 The spotted gar (*Lepiosteus oculatus*), a basal Actinopterygian that diverged prior to the  
134 TGD, has one homolog in each group. Thus, we infer that the four groups represent products of  
135 the two rounds of GD in the ancestor of vertebrates (i.e., ohnologs, Ohno 1970; Wolfe 2000) and  
136 hereafter refer to these as HIF1 $\alpha$ , HIF2 $\alpha$ , HIF3 $\alpha$ , and HIF4 $\alpha$ . The current results support

137 previous observations (Graham and Presnell 2017) and suggest that several sequences described  
138 as “HIF $\alpha$ -like” are HIF3 $\alpha$  or HIF4 $\alpha$  (fig. 1, supplementary table S1, Supplementary Material  
139 online). Like the spotted gar, the Asian arowana (*Scleropages formosus*) has four HIF $\alpha$  genes,  
140 one in each of the major groups. The arowana is in the Osteoglossiformes (bonytongues), an  
141 ancient order that diverged early from the main branch of teleost evolution (Hughes et al. 2018),  
142 but after the TGD (Bian et al. 2016). In this lineage, therefore, one of each pair of HIF $\alpha$  paralogs  
143 resulting from the TGD appears to have been lost due to nonfunctionalization, as predicted for  
144 other TGD paralogs (Bian et al. 2016).

145 Our analysis confirms that Cypriniformes (e.g., zebrafish and common carp) have  
146 duplicated forms of HIF1 $\alpha$  (HIF1 $\alpha$ a and HIF1 $\alpha$ b) and HIF2 $\alpha$  (HIF2 $\alpha$ a and HIF2 $\alpha$ b), which likely  
147 arose during the TGD (Rytkönen et al. 2013). These duplicates are more broadly distributed than  
148 previously appreciated, being present in all the species in Otocephala that were examined,  
149 including Atlantic herring, Mexican tetra, and channel catfish. More derived fishes appear to lack  
150 HIF1 $\alpha$ b, although a truncated version of HIF2 $\alpha$  has been retained (see below; Rytkönen et al.  
151 2013). Otocephala has two other HIF $\alpha$  forms that group with HIF3 $\alpha$  and HIF4 $\alpha$  from spotted gar.  
152 This placement strongly suggests that these forms represent ohnologs arising from the GD in  
153 ancestral vertebrates, rather than HIF3 $\alpha$  duplicates arising from the TGD, as previously proposed  
154 (Rytkönen et al. 2013).

155 The current analysis revealed that Salmoniformes have two forms of HIF1 $\alpha$ , HIF2 $\alpha$ , and  
156 HIF3 $\alpha$  (fig. 1). These duplicates are not observed in the sister group Esociformes (pike) and the  
157 branch lengths joining them are very short, consistent with an origin during the SGD. Berthelot  
158 et al. (2014) noted that rainbow trout retained as many as 48% of the gene duplicates, including  
159 an over-representation of transcription factors. Because salmonids generally occur in well-

160 oxygenated habitats and have poor hypoxia tolerance, there is no apparent link between HIF $\alpha$   
161 duplication and hypoxia tolerance in this group. Rather, these duplicates may play other roles in  
162 salmonid physiology or life-history. Alternatively, duplicates may be destined for  
163 nonfunctionalization, a process that is likely still underway in this lineage (Berthelot et al. 2014).  
164 Only one salmonid-specific duplicate of HIF4 $\alpha$  was recovered in the current analysis, suggesting  
165 one duplicate has already been nonfunctionalized. In addition, HIF4 $\alpha$  appears to be completely  
166 absent in more derived fishes (Neoteleostei).

167         Genomic analysis also supports the broad distribution of a truncated form of HIF2 $\alpha$ ,  
168 occurring in Salmoniformes and all Neoteleostei examined. The deduced protein sequence  
169 corresponds to the N-terminal half of HIF2 $\alpha$ , containing the basic helix-loop-helix and PAS  
170 domains, which are important for DNA-binding and protein dimerization, but lacking sites for  
171 oxygen-dependent regulation of protein stability and gene activation (Rytkönen et al. 2013;  
172 Townley et al. 2017). Although speculative, this truncated form of HIF2 $\alpha$  might act as a negative  
173 regulator by dimerizing with other HIF $\alpha$  subunits and preventing their transcriptional activity, as  
174 demonstrated for similarly truncated forms of HIF3 $\alpha$  that arise from alternative splicing in  
175 mammals (Makino et al. 2002). Alternatively, this form may be undergoing  
176 nonfunctionalization, particularly in Salmoniformes in which even shorter forms are present in  
177 species not included in this genomic analysis.

178         Because the relationship of paralogs arising from the TGD based upon sequence analyses  
179 alone can be ambiguous (supplementary figs. S1-S4, Supplementary Material online; Parey et al.  
180 2020), we used shared synteny among species representing major fish lineages to clarify the  
181 relationships among HIF $\alpha$  paralogs (fig. 2; supplementary table S2, Supplementary Material  
182 online). For HIF1 $\alpha$ , several flanking genes are conserved from spotted gar (*L. oculatus*) through



183 Neoteleost (represented by *X. maculata*). A subset of up to eight neighboring genes is shared  
184 among HIF1 $\alpha$ a in Otocephala (represented by *D. rerio*) and HIF1 $\alpha$  in other fishes, but not found  
185 for Otocephala HIF1 $\alpha$ b. This pattern supports the view that HIF1 $\alpha$ a of Otocephala is orthologous  
186 with HIF1 $\alpha$  in other fishes, whereas HIF1 $\alpha$ b was lost in those lineages (Rytönen et al. 2013).

187         Although the ancestral gene order flanking HIF2 $\alpha$  is not as highly conserved across  
188 species, up to 10 genes are shared among one of the forms found in Otocephala and the truncated  
189 form found in more derived species (yellow arrows, fig. 2B). Rytönen et al. (2013) originally  
190 proposed that this form be recognized as HIF2 $\alpha$ b, a convention we previously endorsed  
191 (Townley et al. 2017) and maintain here (supplementary table S1, Supplementary Material  
192 online). Thus, the other paralog, which includes the first, full-length HIF2 $\alpha$  described in fishes  
193 (Powell and Hahn 2002; Rojas et al. 2007), corresponds to HIF2 $\alpha$ a. In current databases,  
194 however, the names of HIF2 $\alpha$  paralogs are reversed: that is, the full-length and presumably  
195 functional form of HIF2 $\alpha$  is listed as *hif2ab* or *epas1b*, whereas the other form, which is  
196 truncated in most fishes, is *hif2aa* or *epas1a*. Until there is consensus, great care will be needed  
197 when interpreting reports of paralog-specific differences in HIF2 $\alpha$ .

198         Mining of fish genomes yielded only one form of HIF3 $\alpha$  and HIF4 $\alpha$ , and the latter was  
199 completely missing in more derived fishes (see above). The most parsimonious evolutionary  
200 scenario is that one paralog of each gene was lost shortly after the TGD, with the remaining form  
201 of HIF4 $\alpha$  subsequently lost in Neoteleost (fig. 2C, D). An alternative hypothesis is that different  
202 teleost lineages retained different paralogs after the TGD (i.e., divergent silencing; Lynch 2002).  
203 This possibility is supported by the strong conservation of gene order flanking HIF3 $\alpha$  within  
204 Otocephala, with very little shared synteny between Otocephala and other teleost lineages (fig

205 2C; supplemental table S2, Supplementary Material online). Further analyses will be required to  
206 confidently assign orthology of HIF3 $\alpha$  and HIF4 $\alpha$  in extant fishes.

207 As mentioned above, Salmoniformes have duplicates of HIF1 $\alpha$ , HIF2 $\alpha$ , and HIF3 $\alpha$   
208 arising from the SGD. We tentatively group these as “s1” and “s2” based upon sequence  
209 similarity within Salmoniformes and the observation that one of these (s1) shows greater shared  
210 synteny with the corresponding gene in Esociformes, the sister group of Salmoniformes  
211 (supplementary table S2, Supplementary Material online).

212 Among all species examined, the number of exons and length of deduced proteins are  
213 highly conserved within each HIF $\alpha$  type, with the notable exception of the truncated form,  
214 HIF2 $\alpha$ b (fig. 3A, B; supplementary table S3 Supplementary Material online). We also analyzed  
215 variation in the amino acid sequences of putative functional domains, including the N-terminal  
216 and C-terminal oxygen dependent degradation domains (NODD and CODD) that are potential  
217 targets of regulation by prolyl hydroxylases (Epstein et al. 2001) and the extreme C-terminal  
218 CEVN motif targeted by asparaginyl hydroxylase (Lando et al. 2002) (fig. 3C). In general, the  
219 CODD is more highly conserved than the NODD, which is absent in HIF4 $\alpha$ . These observations  
220 support suggestions that the CODD is more critical in determining the oxygen-dependence of  
221 HIF $\alpha$  subunit degradation (Epstein et al. 2001; Zhang et al. 2014). Within the CODD, however,  
222 sequence variation among forms of HIF $\alpha$  may be a source of functional divergence among  
223 ohnologs. For example, M<sub>n-3</sub> is found in HIF1 $\alpha$  and HIF3 $\alpha$  and G<sub>n+6</sub> is found in HIF2 $\alpha$  and  
224 HIF4 $\alpha$  (where n is the P that is putatively hydroxylated), and both residues are important in  
225 mediating HIF $\alpha$  degradation (Tarade et al. 2019). Finally, the lack of the CEVN sequence in  
226 HIF3 $\alpha$  (Gu et al. 1998; Duan 2016) and lack of the critical asparagine in salmonid HIF4 $\alpha$   
227 suggests that these subunits are not subject to regulation by asparaginyl hydroxylation.

228 Conclusions

229 Here, we provide evidence that basal Actinopterygians retain four copies of HIF $\alpha$  that arose from  
230 the two rounds of GD at the base of vertebrate evolution. We advocate that a growing number of  
231 “HIF $\alpha$ -like” genes be recognized as HIF3 $\alpha$  or HIF4 $\alpha$ , as deduced by sequence analysis and  
232 shared synteny. The TGD and SGD in more derived fishes, followed by gene truncation and  
233 losses, resulted in the current diversity of HIF $\alpha$  among ray-finned fishes. Future research may  
234 better define the phylogenetic distribution and timing of gene loss events and determine whether  
235 different fish lineages retained different paralogs of HIF3 $\alpha$  and HIF4 $\alpha$ . In addition, functional  
236 analyses of HIF $\alpha$  paralogs, including truncated forms of HIF2 $\alpha$ b, could illuminate the  
237 contribution of these duplicates to the oxygen relations and the general biology of ray-finned  
238 fishes. Hypotheses that the presence of gene duplicates confers enhanced tolerance of hypoxia,  
239 for example in cyprinids, should be re-examined in light of gene duplicates in closely related  
240 taxa (e.g., herring) or separate lineages (e.g., Salmoniformes) that are not particularly tolerant of  
241 low oxygen. It is plausible that these transcription factor duplicates have taken on functions apart  
242 from oxygen regulated gene expression (neofunctionalization) that may have contributed to the  
243 evolutionary and ecological success of Actinopterygii.

244

245 Acknowledgements: We thank Jenna D. Hill and Nicholas J. Vogler for assistance in the initial  
246 stages of database searching and conserved domain analysis, respectively. We thank Drs. James  
247 Grady (University of New Orleans), Mark Hahn, Sibel Karchner (Woods Hole Oceanographic  
248 Institution), and Li Zhao (Rockefeller University) for constructive comments on this manuscript.  
249 This work was supported by the Greater New Orleans Foundation.

250

251 Data Availability Statement: The data underlying this article are available at the National Center  
252 for Biotechnology Information at <https://www.ncbi.nlm.nih.gov/> or at Ensembl at [https://](https://ensembl.org/index.html)  
253 [ensembl.org/index.html](https://ensembl.org/index.html). All gene identification, mRNA, and protein accession numbers are  
254 provided in supplementary table S1, Supplementary Material online.

255 References

- 256 Berthelot C, Brunet F, Chalopin D, Juanchich A, Bernard M, Noël B, Bento P, Da Silva C,  
257 Labadie K, Alberti A, et al. 2014. The rainbow trout genome provides novel insights into  
258 evolution after whole-genome duplication in vertebrates. *Nat Commun.* 5:3657.  
259 doi:10.1038/ncomms4657.
- 260 Bian C, Hu Y, Ravi V, Kuznetsova IS, Shen X, Mu X, Sun Y, You X, Li J, Li X, et al. 2016. The  
261 Asian arowana (*Scleropages formosus*) genome provides new insights into the evolution of an  
262 early lineage of teleosts. *Sci Rep.* 6:24501. doi:10.1038/srep24501.
- 263 Bouckaert R, Heled J, Kühnert D, Vaughan T, Wu C-H, Xie D, Suchard MA, Rambaut A,  
264 Drummond AJ. 2014. BEAST 2: A software platform for bayesian evolutionary analysis. *PLOS*  
265 *Comput Biol.* 10(4):e1003537. doi:10.1371/journal.pcbi.1003537.
- 266 Braasch I, Gehrke AR, Smith JJ, Kawasaki K, Manousaki T, Pasquier J, Amores A, Desvignes  
267 T, Batzel P, Catchen J, et al. 2016. The spotted gar genome illuminates vertebrate evolution and  
268 facilitates human-teleost comparisons. *Nat Genet.* 48(4):427–437. doi:10.1038/ng.3526.
- 269 Dehal P, Boore JL. 2005. Two rounds of whole genome duplication in the ancestral vertebrate.  
270 *PLOS Biol.* 3(10):e314. doi:10.1371/journal.pbio.0030314.
- 271 Drummond AJ, Ho SYW, Phillips MJ, Rambaut A. 2006. Relaxed Phylogenetics and Dating  
272 with Confidence. *PLOS Biol.* 4(5):e88. doi:10.1371/journal.pbio.0040088.
- 273 Drummond AJ, Suchard MA, Xie D, Rambaut A. 2012. Bayesian Phylogenetics with BEAUti  
274 and the BEAST 1.7. *Mol Biol Evol.* 29(8):1969–1973. doi:10.1093/molbev/mss075.
- 275 Duan C. 2016. Hypoxia-inducible factor 3 biology: complexities and emerging themes. *Am J*  
276 *Physiol Cell Physiol.* 310(4):C260-269. doi:10.1152/ajpcell.00315.2015.
- 277 Epstein AC, Gleadle JM, McNeill LA, Hewitson KS, O'Rourke J, Mole DR, Mukherji M,  
278 Metzen E, Wilson MI, Dhanda A, et al. 2001. *C. elegans* EGL-9 and mammalian homologs  
279 define a family of dioxygenases that regulate HIF by prolyl hydroxylation. *Cell.* 107(1):43–54.  
280 doi:10.1016/s0092-8674(01)00507-4.
- 281 Felsenstein J. 1985. Confidence Limits on Phylogenies: An Approach Using the Bootstrap.  
282 *Evolution.* 39(4):783–791. doi:10.1111/j.1558-5646.1985.tb00420.x.
- 283 Force A, Lynch M, Pickett FB, Amores A, Yan YL, Postlethwait J. 1999. Preservation of  
284 duplicate genes by complementary, degenerative mutations. *Genetics.* 151(4):1531–1545.
- 285 Glasauer SMK, Neuhauss SCF. 2014. Whole-genome duplication in teleost fishes and its  
286 evolutionary consequences. *Mol Genet Genomics MGG.* 289(6):1045–1060.  
287 doi:10.1007/s00438-014-0889-2.

- 288 Graham AM, Presnell JS. 2017. Hypoxia Inducible Factor (HIF) transcription factor family  
289 expansion, diversification, divergence and selection in eukaryotes. *PloS One*. 12(6):e0179545.  
290 doi:10.1371/journal.pone.0179545.
- 291 Gu YZ, Hogenesch JB, Bradfield CA. 2000. The PAS superfamily: sensors of environmental and  
292 developmental signals. *Annu Rev Pharmacol Toxicol*. 40:519–561.  
293 doi:10.1146/annurev.pharmtox.40.1.519.
- 294 Gu Y-Z, Moran SM, Hogenesch JB, Wartman L, Bradfield CA. 1998. Molecular characterization  
295 and chromosomal localization of a third  $\alpha$ -class hypoxia inducible factor subunit, HIF3 $\alpha$ . *Gene*  
296 *Expr*. 7(3):205–213.
- 297 Guo B. 2017. Complex genes are preferentially retained after whole-genome duplication in  
298 teleost fish. *J Mol Evol*. 84(5–6):253–258. doi:10.1007/s00239-017-9794-8.
- 299 Hughes LC, Ortí G, Huang Y, Sun Y, Baldwin CC, Thompson AW, Arcila D, Betancur-R R, Li  
300 C, Becker L, et al. 2018. Comprehensive phylogeny of ray-finned fishes (Actinopterygii) based  
301 on transcriptomic and genomic data. *Proc Natl Acad Sci U S A*. 115(24):6249–6254.  
302 doi:10.1073/pnas.1719358115.
- 303 Inoue J, Sato Y, Sinclair R, Tsukamoto K, Nishida M. 2015. Rapid genome reshaping by  
304 multiple-gene loss after whole-genome duplication in teleost fish suggested by mathematical  
305 modeling. *Proc Natl Acad Sci U S A*. 112(48):14918–14923. doi:10.1073/pnas.1507669112.
- 306 Jones DT, Taylor WR, Thornton JM. 1992. The rapid generation of mutation data matrices from  
307 protein sequences. *Bioinformatics*. 8(3):275–282. doi:10.1093/bioinformatics/8.3.275.
- 308 Kaelin WG, Ratcliffe PJ. 2008. Oxygen sensing by metazoans: the central role of the HIF  
309 hydroxylase pathway. *Mol Cell*. 30(4):393–402. doi:10.1016/j.molcel.2008.04.009.
- 310 Katoh K, Standley DM. 2013. MAFFT Multiple Sequence Alignment Software Version 7:  
311 Improvements in Performance and Usability. *Mol Biol Evol*. 30(4):772–780.  
312 doi:10.1093/molbev/mst010.
- 313 Katoh K, Standley DM. 2016. A simple method to control over-alignment in the MAFFT  
314 multiple sequence alignment program. *Bioinformatics*. 32(13):1933–1942.  
315 doi:10.1093/bioinformatics/btw108.
- 316 Kumar S, Stecher G, Li M, Knyaz C, Tamura K. 2018. MEGA X: Molecular Evolutionary  
317 Genetics Analysis across Computing Platforms. *Mol Biol Evol*. 35(6):1547–1549.  
318 doi:10.1093/molbev/msy096.
- 319 Lando D, Peet DJ, Gorman JJ, Whelan DA, Whitelaw ML, Bruick RK. 2002. FIH-1 is an  
320 asparaginyl hydroxylase enzyme that regulates the transcriptional activity of hypoxia-inducible  
321 factor. *Genes Dev*. 16(12):1466–1471. doi:10.1101/gad.991402.
- 322 Lynch M. 2002. Gene duplication and evolution. *Science*. 297(5583):945–947.  
323 doi:10.1126/science.1075472.

- 324 Lynch M, Conery JS. 2000. The evolutionary fate and consequences of duplicate genes. *Science*.  
325 290(5494):1151–1155. doi:10.1126/science.290.5494.1151.
- 326 Macqueen DJ, Johnston IA. 2014. A well-constrained estimate for the timing of the salmonid  
327 whole genome duplication reveals major decoupling from species diversification. *Proc R Soc B*  
328 *Biol Sci*. 281(1778):20132881. doi:10.1098/rspb.2013.2881.
- 329 Makino Y, Kanopka A, Wilson WJ, Tanaka H, Poellinger L. 2002. Inhibitory PAS domain  
330 protein (IPAS) is a hypoxia-inducible splicing variant of the hypoxia-inducible factor-3alpha  
331 locus. *J Biol Chem*. 277(36):32405–32408. doi:10.1074/jbc.C200328200.
- 332 McIntosh BE, Hogenesch JB, Bradfield CA. 2010. Mammalian Per-Arnt-Sim proteins in  
333 environmental adaptation. *Annu Rev Physiol*. 72(1):625–645. doi:10.1146/annurev-physiol-  
334 021909-135922.
- 335 Nikinmaa M, Rees BB. 2005. Oxygen-dependent gene expression in fishes. *Am J Physiol Regul*  
336 *Integr Comp Physiol*. 288(5):R1079-1090. doi:10.1152/ajpregu.00626.2004.
- 337 Ohno S. 1970. *Evolution by gene duplication*. Berlin Heidelberg: Springer-Verlag.
- 338 Parey, E, Louis, A, Cabau, C, Gulgenn, Y, Crollius, HR, Berthelot, C. 2020. Synteny-guided  
339 resolution of gene trees clarifies the functional impact of whole genome duplications. *Mol Biol*  
340 *Evol*, doi.org/10.1093/molbev/msaa149
- 341 Pasquier J, Cabau C, Nguyen T, Jouanno E, Severac D, Braasch I, Journot L, Pontarotti P, Klopp  
342 C, Postlethwait JH, et al. 2016. Gene evolution and gene expression after whole genome  
343 duplication in fish: the PhyloFish database. *BMC Genomics*. 17:368. doi:10.1186/s12864-016-  
344 2709-z.
- 345 Penn O, Privman E, Ashkenazy H, Landan G, Graur D, Pupko T. 2010. GUIDANCE: a web  
346 server for assessing alignment confidence scores. *Nucleic Acids Res*. 38(suppl\_2):W23–W28.  
347 doi:10.1093/nar/gkq443.
- 348 Postlethwait JH, Woods IG, Ngo-Hazelett P, Yan YL, Kelly PD, Chu F, Huang H, Hill-Force A,  
349 Talbot WS. 2000. Zebrafish comparative genomics and the origins of vertebrate chromosomes.  
350 *Genome Res*. 10(12):1890–1902. doi:10.1101/gr.164800.
- 351 Powell WH, Hahn ME. 2002. Identification and functional characterization of hypoxia-inducible  
352 factor 2alpha from the estuarine teleost, *Fundulus heteroclitus*: interaction of HIF-2alpha with  
353 two ARNT2 splice variants. *J Exp Zool*. 294(1):17–29. doi:10.1002/jez.10074.
- 354 Ravi V, Venkatesh B. 2018. The divergent genomes of teleosts. *Annu Rev Anim Biosci*. 6:47–  
355 68. doi:10.1146/annurev-animal-030117-014821.
- 356 Rojas DA, Perez-Munizaga DA, Centanin L, Antonelli M, Wappner P, Allende ML, Reyes AE.  
357 2007. Cloning of hif-1alpha and hif-2alpha and mRNA expression pattern during development in  
358 zebrafish. *Gene Expr Patterns GEP*. 7(3):339–345. doi:10.1016/j.modgep.2006.08.002.



- 359 Rytönen KT, Akbarzadeh A, Miandare HK, Kamei H, Duan C, Leder EH, Williams TA,  
360 Nikinmaa M. 2013. Subfunctionalization of cyprinid hypoxia-inducible factors for roles in  
361 development and oxygen sensing. *Evol Int J Org Evol*. 67(3):873–882. doi:10.1111/j.1558-  
362 5646.2012.01820.x.
- 363 Rytönen KT, Williams TA, Renshaw GM, Primmer CR, Nikinmaa M. 2011. Molecular  
364 evolution of the metazoan PHD-HIF oxygen-sensing system. *Mol Biol Evol*. 28(6):1913–1926.  
365 doi:10.1093/molbev/msr012.
- 366 Sacerdot C, Louis A, Bon C, Berthelot C, Roest Crolius H. 2018. Chromosome evolution at the  
367 origin of the ancestral vertebrate genome. *Genome Biol*. 19(1):166. doi:10.1186/s13059-018-  
368 1559-1.
- 369 Sela I, Ashkenazy H, Katoh K, Pupko T. 2015. GUIDANCE2: accurate detection of unreliable  
370 alignment regions accounting for the uncertainty of multiple parameters. *Nucleic Acids Res*.  
371 43(W1):W7–W14. doi:10.1093/nar/gkv318.
- 372 Semenza GL. 2011. Oxygen sensing, homeostasis, and disease. *N Engl J Med*. 365(6):537–547.  
373 doi:10.1056/NEJMra1011165.
- 374 Tarade D, Lee JE, Ohh M. 2019. Evolution of metazoan oxygen-sensing involved a conserved  
375 divergence of VHL affinity for HIF1 $\alpha$  and HIF2 $\alpha$ . *Nature Comm* 10:3293.  
376 doi.org/10.1038/s41467-019-11149-1
- 377 Townley IK, Karchner SI, Skripnikova E, Wiese TE, Hahn ME, Rees BB. 2017. Sequence and  
378 functional characterization of hypoxia-inducible factors, HIF1 $\alpha$ , HIF2 $\alpha$ , and HIF3 $\alpha$ , from the  
379 estuarine fish, *Fundulus heteroclitus*. *Am J Physiol Regul Integr Comp Physiol*. 312(3):R412–  
380 R425. doi:10.1152/ajpregu.00402.2016.
- 381 Volff J-N. 2005. Genome evolution and biodiversity in teleost fish. *Heredity*. 94(3):280–294.  
382 doi:10.1038/sj.hdy.6800635.
- 383 Waterhouse AM, Procter JB, Martin DMA, Clamp M, Barton GJ. 2009. Jalview Version 2--a  
384 multiple sequence alignment editor and analysis workbench. *Bioinforma Oxf Engl*. 25(9):1189–  
385 1191. doi:10.1093/bioinformatics/btp033.
- 386 Wheeler TJ, Clements J, Finn RD. 2014. Skylign: a tool for creating informative, interactive  
387 logos representing sequence alignments and profile hidden Markov models. *BMC*  
388 *Bioinformatics*. 15(1):7. doi:10.1186/1471-2105-15-7.
- 389 Wolfe, K. 2000. Robustness--it's not where you think it is. *Nat Genet* 25: 3-4.  
390 doi.org/10.1038/75560
- 391 Zhang P, Yao Q, Lu L, Li Y, Chen P-J, Duan C. 2014. Hypoxia-inducible factor 3 is an oxygen-  
392 dependent transcription activator and regulates a distinct transcriptional response to hypoxia.  
393 *Cell Rep*. 6(6):1110–1121. doi:10.1016/j.celrep.2014.02.011.

394



395 **Box 1. HIF gene symbols**

396

397 Symbols for the hypoxia inducible factor alpha subunit follow the format:

398 
$$\begin{pmatrix} HIF \\ hif \end{pmatrix} \begin{pmatrix} 1 \\ 2 \\ 3 \\ 4 \end{pmatrix} \begin{pmatrix} A \\ a \end{pmatrix} \begin{pmatrix} a \\ b \end{pmatrix}$$

399 Generally, the following conventions apply:

400

401 1. The Human Genome Consortium Gene Nomenclature Committee specifies that gene  
402 symbols be all capital letters. The Zebrafish Nomenclature Conventions specifies  
403 lowercase Latin letters for gene symbols. For other species, uppercase, lowercase, or  
404 both have been used. The current study follows the convention for humans which has  
405 been broadly applied to other vertebrates and invertebrates (e.g., Graham and  
406 Presnell, 2017).

407 2. Paralogs that arose during two rounds of genome duplication at the base of vertebrate  
408 evolution are indicated by Arabic numbers (1-4).

409 3. Because electronic databases are not uniformly compatible with Greek letters, Latin  
410 letters (upper case in humans, lowercase in zebrafish) are used to distinguish the  $\alpha$   
411 subunit from the  $\beta$  subunit, which was originally described as the aryl hydrocarbon  
412 receptor nuclear translocator.

413 4. Paralogs that arose from the teleost-specific genome duplication are indicated by  
414 lowercase Latin letters ( $a$  or  $b$ ).

415 5.

416 Thus, the gene encoding the  $\alpha$  subunit of the hypoxia inducible factor 1 is *HIF1A* in humans, but  
417 the two paralogs in zebrafish that arose from the TGD are *hif1aa* and *hif1ab*. Also, because the  $\alpha$   
418 subunit of the hypoxia inducible factor 2 was initially described as endothelial PAS-domain  
419 protein, this gene is also known as *EPAS1* in humans and *epas1a* or *epas1b* in zebrafish.

420

421

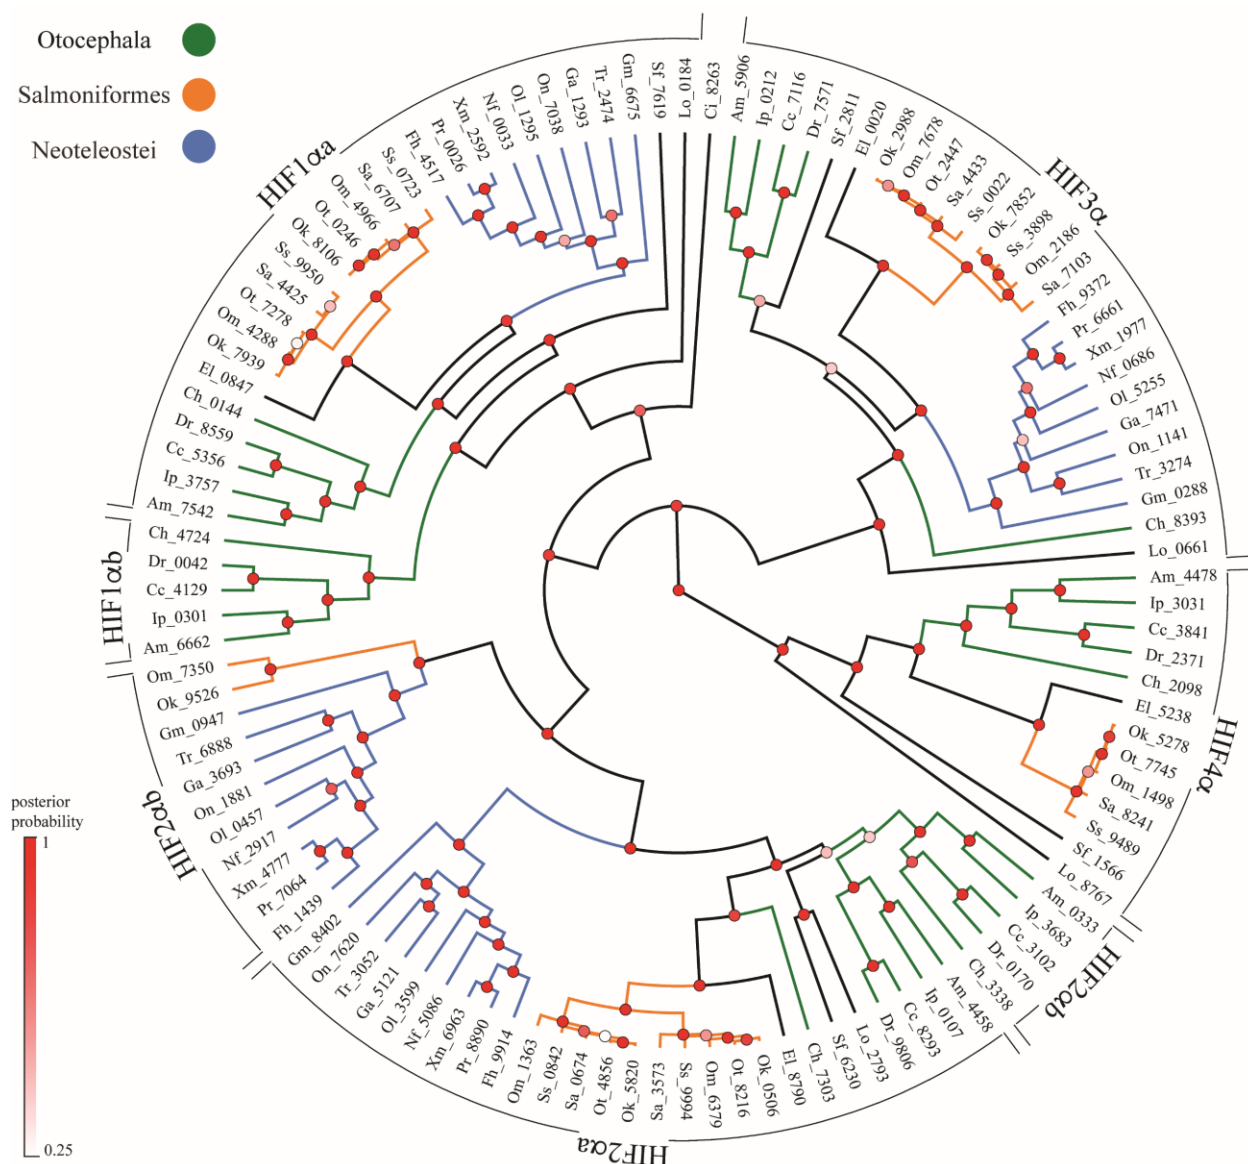

422

423

424 Fig. 1. Phylogeny of Actinopterygian HIF $\alpha$  reconstructed by Bayesian inference using full-length  
 425 coding sequences. Analyses used the General Time Reversible model (GTR) with 6 gamma  
 426 categories (+G) and allowing for invariants (+I). The tree with maximum clade credibility and  
 427 mean heights is shown and the nodes are colored by posterior probability values. HIF $\alpha$  homology  
 428 groups are shown on the periphery and the following taxa are color coded within each group:  
 429 Otocephala (green); Salmoniformes (orange); Neoteleostei (blue). The outgroup, *Ciona*  
 430 *intestinalis*, basal Actinopterygian (spotted gar, *Lepisosteus oculatus*), basal teleost (Asian  
 431 arowana, *Scleropages formosus*), and sister taxa to Salmoniformes (Northern pike, *Esox lucius*),  
 432 are not color coded. Sequences are identified by the first letter of the genus and species followed  
 433 by the last four digits of the NCBI or Ensemble reference gene accession number (see  
 434 supplementary table S1, Supplementary Material online for a full list of genes).

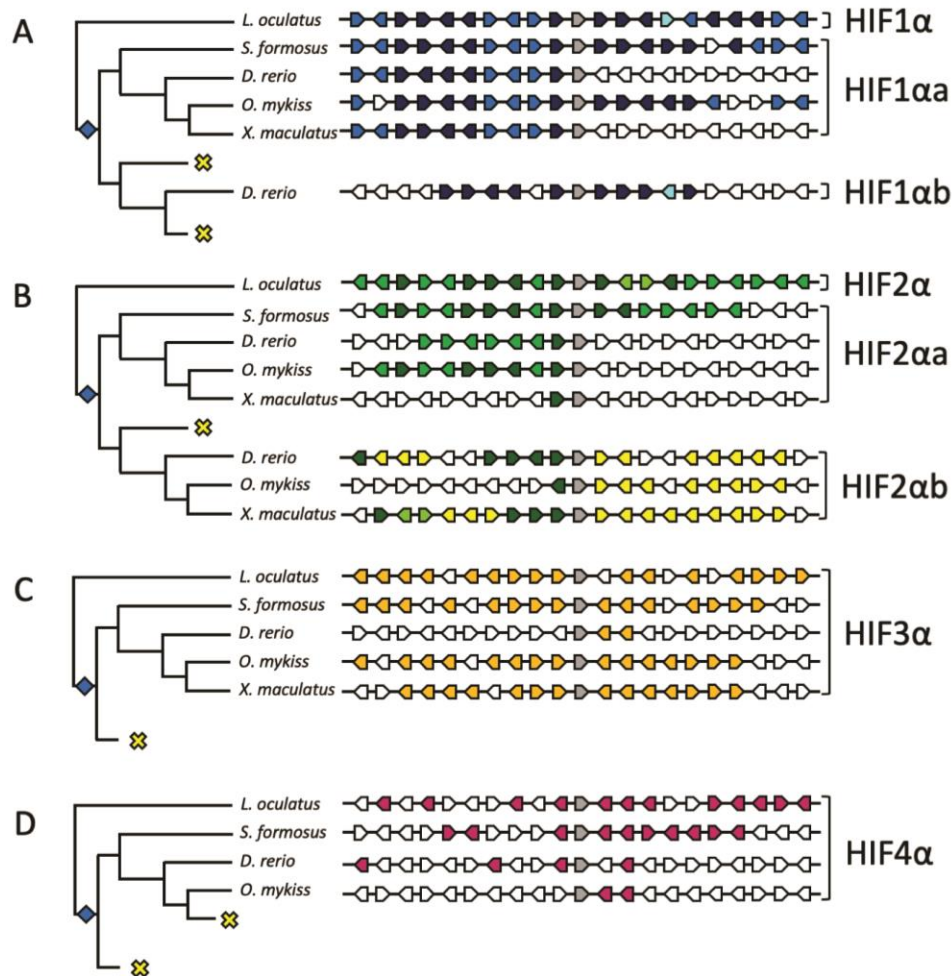

435

436 Fig. 2. Synteny analysis of Actinopterygian HIF1 $\alpha$ . The ten flanking genes on either side of each  
 437 HIF $\alpha$  subunit (grey arrows) are compared among spotted gar (*L. oculatus*), Asian arowana (*S.*  
 438 *formosus*), zebrafish (*D. rerio*), rainbow trout (*O. mykiss*), and southern platyfish (*X.*  
 439 *maculatus*).  
 440 A. Flanking genes shared between spotted gar HIF1 $\alpha$  and both HIF1 $\alpha$  paralogs in more derived  
 441 fishes are shown as dark blue arrows, genes shared between spotted gar HIF1 $\alpha$  and HIF1 $\alpha$ a are  
 442 shown as medium blue arrows, and genes shared between spotted gar HIF1 $\alpha$  and HIF1 $\alpha$ b are  
 443 shown as light blue arrows. B. Flanking genes shared between spotted gar HIF2 $\alpha$  and both  
 444 HIF2 $\alpha$  paralogs in more derived fishes are shown as dark green arrows, genes shared between  
 445 spotted gar HIF2 $\alpha$  and HIF2 $\alpha$ a are shown as medium green arrows, and genes shared between  
 446 spotted gar HIF2 $\alpha$  and HIF2 $\alpha$ b are shown as light green arrows. In addition, genes shared among  
 447 HIF2 $\alpha$ b, but not present in spotted gar, are shown as yellow arrows. For HIF3 $\alpha$  (C) and HIF4 $\alpha$   
 448 (D), flanking genes shared between spotted gar and more derived species are shown as orange  
 449 and purple arrows, respectively. The relationships among fishes is from Hughes et al (2018) and  
 450 branch lengths do not indicate divergence times. The teleost-specific genome duplication is  
 451 indicated by the blue diamonds, and putative losses of specific HIF $\alpha$  forms are shown by the  
 452 yellow crosses. For abbreviations of flanking genes, see supplementary table S2, Supplementary  
 Material online.

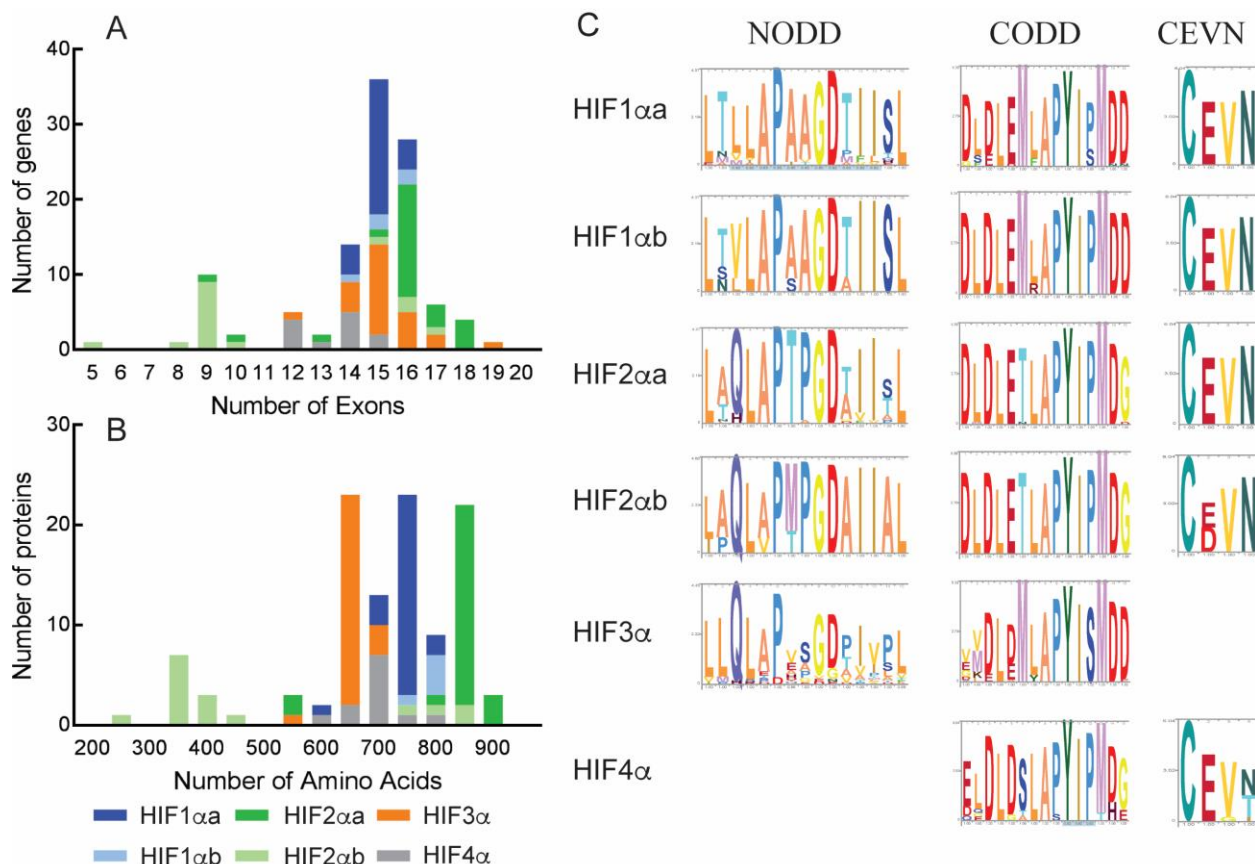

453  
454

455 Fig. 3. Exon number (A), deduced protein length (B), and consensus sequences for putative  
456 hydroxylation domains (C) for teleost HIF $\alpha$  subunits. Median values for exon number and amino  
457 acid number were as follows: HIF1 $\alpha$ a = 15 exons, 759 amino acids (n=26); HIF1 $\alpha$ b, 15 exons,  
458 777 amino acids (n=5); HIF2 $\alpha$ a, 16 exons, 853 amino acids (n=26); HIF3 $\alpha$ , 15 exons, 646 amino  
459 acids (n=25); HIF4 $\alpha$ , 14 exons, 716 amino acids (n=12). For HIF2 $\alpha$ b, the distributions were  
460 bimodal, with median values of 16 exons and 816 amino acids for Otocephala (n=5) and 9 exons  
461 and 370 amino acids for other teleost (n=11). Exon number and deduced protein lengths for  
462 individual sequences are shown in supplementary table S1, Supplementary Material online, and  
463 summary statistics for major taxonomic groups are shown in supplementary table S3,  
464 Supplementary Material online. Consensus sequences for the N- and C-terminal oxygen-  
465 dependent degradation domains (NODD and CODD) and the C-terminal asparaginyl  
466 hydroxylation motif (CEVN) were identified from multiple sequence alignments and visualized  
467 with Skylign. The absence of a consensus sequence indicates that domain was not conserved for  
468 the respective HIF $\alpha$  subunit. Data for spotted gar (*Lepisosteus oculatus*) are not included.
