# Supplementary material for: Genomic Analysis of Hypoxia Inducible Factor Alpha Evolution in Ray-finned Fishes (Actinopterygii)
Source: bioRxiv or medRxiv preprint supplement (doi:10.1101/2021.04.16.440203), 2021-04-18
Supplement: Supplementary file [file media-2.pdf]

## Supplemental Table Legends

**Table S1. List of HIF $\alpha$  sequences used for phylogenetic analyses.** For each sequence, the organism name (species and common name) and order (*sensu* Hughes et al. 2018) are given. Gene name, aliases, Gene ID, mRNA accession, protein accession, and gene and protein statistics are from GenBank, except for three-spined stickleback (*Gasterosteus aculeatus*) which are from Ensemble. The gene group is based upon the phylogenetic and synteny analyses reported here (figure 1, electronic supplementary material, table S2). When multiple variants were identified within a locus, the longest form was selected. **NOTE:** data for spotted gar (*Lepisosteus oculatus*) HIF1 $\alpha$  were generated by concatenation of two partial sequences (Gene ID 107077742 and 102694568).

**Table S2. Synteny analysis of Actinopterygian HIF $\alpha$  subunits.** The ten flanking genes on either side of each HIF $\alpha$  subunit were determined for spotted gar (*L. oculatus*), Asian arowana (*S. formosus*), representative Otocephala (*D. rerio* and *A. mexicanus*), northern pike (*E. lucius*), rainbow trout (*O. mykiss*), and representative Neoteleost (*X. maculatus* and *T. rubripes*). Flanking genes shared between spotted gar HIF1 $\alpha$  and both HIF1 $\alpha$  paralogs in more derived fishes are highlighted in dark blue, genes shared between spotted gar HIF1 $\alpha$  and HIF1 $\alpha$ a are highlighted in medium blue, and genes shared between spotted gar HIF1 $\alpha$  and HIF1 $\alpha$ b are highlighted in light blue. Flanking genes shared between spotted gar HIF2 $\alpha$  and both HIF2 $\alpha$  paralogs in more derived fishes are highlighted in dark green, genes shared between spotted gar HIF2 $\alpha$  and HIF2 $\alpha$ a are highlighted in medium green, and genes shared between spotted gar HIF2 $\alpha$  and HIF2 $\alpha$ b are highlighted in light green. In addition, genes shared among HIF2 $\alpha$ b, but not present in spotted gar, are highlighted in yellow. Flanking genes shared between spotted gar HIF3 $\alpha$  and HIF3 $\alpha$  from more derived species are highlighted in orange. Flanking genes shared between spotted gar HIF4 $\alpha$  and HIF4 $\alpha$  from more derived species are highlighted in purple. Gene ID, chromosomal or linkage group assignment, mRNA accession, and protein accession are from GenBank. Gene orientation indicated by the forward or reverse arrow heads (-> or <-).

**Table S3. Exon number and deduced protein length of Actinopterygian HIF $\alpha$  subunits.** HIF $\alpha$  group is based upon phylogenetic analysis (figure 1) and synteny (figure 2, electronic supplementary material, table S2). Within each HIF $\alpha$ , species are grouped according to phylogeny (Hughes et al. 2018). The number of species in each group is indicated, along with the minimum, maximum, and median values for exon number and amino acid number for the deduced protein sequence. When multiple variants were identified within a locus, the longest form was selected. Data for spotted gar (*Lepisosteus oculatus*) are not included.



| Species                      | Common Name        | Order              | Genbank or Ensemble Gene Name                    | Group     | Aliases       | Gene ID (Genbank) | Chromosome # | Exons | mRNA Accession No. | Protein Accession No. | Protein Length (aa) |
|------------------------------|--------------------|--------------------|--------------------------------------------------|-----------|---------------|-------------------|--------------|-------|--------------------|-----------------------|---------------------|
| <i>Oryzias latipes</i>       | Japanese ricefish  | Belontiiformes     | hypoxia-inducible factor 1 subunit alpha, like   | HIF3A     | hif1a         | 1011165163        | 13           | 16    | XM_004075255       | XP_004075303          | 650                 |
| <i>Poecilia reticulata</i>   | guppy              | Cyprinodontiformes | hypoxia inducible factor 1 subunit alpha a       | HIF1Aa    | hif1aa        | 103458897         | LG22         | 15    | XM_008400026       | XP_008398248          | 764                 |
| <i>Poecilia reticulata</i>   | guppy              | Cyprinodontiformes | endothelial PAS domain-containing protein 1-like | HIF2Aa    | epas1         | 103476630         | LG15         | 9     | XM_017308890       | XP_017164379          | 557                 |
| <i>Poecilia reticulata</i>   | guppy              | Cyprinodontiformes | endothelial PAS domain protein 1a                | HIF2Ab    | epas1, epas1a | 103481538         | LG19         | 9     | XM_008437064       | XP_008435286          | 370                 |
| <i>Poecilia reticulata</i>   | guppy              | Cyprinodontiformes | hypoxia-inducible factor 1 subunit alpha, like   | HIF3A     | hif1a         | 103475214         | LG13         | 14    | XM_008426661       | XP_008424883          | 674                 |
| <i>Salmo salar</i>           | Atlantic salmon    | Salmoniformes      | hypoxia-inducible factor 1-alpha                 | HIF1Aa_s1 | hif1a         | 106598919         | ssa01        | 15    | XM_014189950       | XP_014045425          | 762                 |
| <i>Salmo salar</i>           | Atlantic salmon    | Salmoniformes      | hypoxia-inducible factor 1-alpha-like            | HIF1Aa_s2 | hif1a         | 106610969         | ssa09        | 15    | XM_014210723       | XP_014066198          | 802                 |
| <i>Salmo salar</i>           | Atlantic salmon    | Salmoniformes      | endothelial PAS domain protein 1                 | HIF2Aa_s1 | epas1         | 106589722         | ssa28        | 16    | XM_014179994       | XP_014035469          | 853                 |
| <i>Salmo salar</i>           | Atlantic salmon    | Salmoniformes      | endothelial PAS domain-containing protein 1-like | HIF2Aa_s2 | epas1         | 106611028         | ssa01        | 17    | XM_014210842       | XP_014066317          | 854                 |
| <i>Salmo salar</i>           | Atlantic salmon    | Salmoniformes      | hypoxia-inducible factor 1-alpha                 | HIF3A_s1  | hif1a         | 100194993         | ssa20        | 16    | NM_001134022       | NP_001133494          | 628                 |
| <i>Salmo salar</i>           | Atlantic salmon    | Salmoniformes      | hypoxia-inducible factor 1-alpha-like            | HIF3A_s2  | hif1a         | 106612598         | ssa09        | 15    | XM_014213898       | XP_014069373          | 633                 |
| <i>Salmo salar</i>           | Atlantic salmon    | Salmoniformes      | hypoxia-inducible factor 1 subunit alpha, like 2 | HIF4A     | hif1a2        | 106563688         | ssa11        | 12    | XM_014129489       | XP_013984964          | 725                 |
| <i>Salvelinus alpinus</i>    | arctic char        | Salmoniformes      | hypoxia-inducible factor 1-alpha                 | HIF1Aa_s1 | hif1a         | 111968658         | LG9          | 14    | XM_023994425       | XP_023850193          | 756                 |
| <i>Salvelinus alpinus</i>    | arctic char        | Salmoniformes      | hypoxia-inducible factor 1-alpha                 | HIF1Aa_s2 | hif1a         | 111963342         | LG4q.2       | 16    | XM_023986707       | XP_023842475          | 759                 |
| <i>Salvelinus alpinus</i>    | arctic char        | Salmoniformes      | endothelial PAS domain protein 1                 | HIF2Aa_s1 | epas1         | 111968049         | LG8          | 17    | XM_023993573       | XP_023849341          | 853                 |
| <i>Salvelinus alpinus</i>    | arctic char        | Salmoniformes      | endothelial PAS domain-containing protein 1-like | HIF2Aa_s2 | epas1l        | 112073362         | Un           | 15    | XM_024140674       | XP_023996442          | 849                 |
| <i>Salvelinus alpinus</i>    | arctic char        | Salmoniformes      | hypoxia-inducible factor 1-alpha                 | HIF3A_s1  | hif1a         | 111982824         | LG22         | 15    | XM_024014433       | XP_023870201          | 629                 |
| <i>Salvelinus alpinus</i>    | arctic char        | Salmoniformes      | hypoxia-inducible factor 1-alpha                 | HIF3A_s2  | hif1a         | 111949752         | LG22         | 16    | XM_023967103       | XP_023822871          | 659                 |
| <i>Salvelinus alpinus</i>    | arctic char        | Salmoniformes      | hypoxia inducible factor 1 subunit alpha, like 2 | HIF4A     | hif1a2, npas1 | 111964361         | LG5          | 12    | XM_023988241       | XP_023844009          | 721                 |
| <i>Scleropages formosus</i>  | Asian arowana      | Osteoglossiformes  | hypoxia inducible factor 1 subunit alpha a       | HIF1Aa    | hif1a, hif1aa | 108919562         | 15           | 15    | XM_018727619       | XP_018583135          | 762                 |
| <i>Scleropages formosus</i>  | Asian arowana      | Osteoglossiformes  | endothelial PAS domain protein 1b                | HIF2Aa    | epas1, epas1b | 108942753         | 8            | 18    | XM_018766230       | XP_018621746          | 881                 |
| <i>Scleropages formosus</i>  | Asian arowana      | Osteoglossiformes  | hypoxia inducible factor 1 subunit alpha, like   | HIF3A     | hif1a         | 108928738         | 10           | 19    | XM_018742811       | XP_018598327          | 628                 |
| <i>Scleropages formosus</i>  | Asian arowana      | Osteoglossiformes  | hypoxia inducible factor 1 subunit alpha, like 2 | HIF4A     | hif1a2        | 108934068         | 4            | 15    | XM_018751566       | XP_018607082          | 711                 |
| <i>Takifugu rubripes</i>     | torafugu           | Tetraodontiformes  | hypoxia inducible factor 1 subunit alpha a       | HIF1Aa    | hif1a, hif1aa | 101071027         | 2            | 15    | XM_003962474       | XP_003962523          | 755                 |
| <i>Takifugu rubripes</i>     | torafugu           | Tetraodontiformes  | endothelial PAS domain protein 1b                | HIF2Aa    | epas1, epas1b | 101067536         | 4            | 16    | XM_011603052       | XP_011601354          | 854                 |
| <i>Takifugu rubripes</i>     | torafugu           | Tetraodontiformes  | endothelial PAS domain protein 1                 | HIF2Ab    | epas1         | 101073099         | 1            | 9     | XM_003976888       | XP_003976937          | 359                 |
| <i>Takifugu rubripes</i>     | torafugu           | Tetraodontiformes  | hypoxia inducible factor 1 subunit alpha, like   | HIF3A     | hif1a         | 101062698         | 11           | 16    | XM_029843274       | XP_029699134          | 676                 |
| <i>Xiphophorus maculatus</i> | southern platyfish | Cyprinodontiformes | hypoxia inducible factor 1 subunit alpha         | HIF1Aa    | hif1aa        | 102217674         | 19           | 15    | XM_023325292       | XP_023208360          | 758                 |
| <i>Xiphophorus maculatus</i> | southern platyfish | Cyprinodontiformes | endothelial PAS domain protein 1b                | HIF2Aa    | epas1, epas1b | 102218651         | 22           | 16    | XM_023326963       | XP_023182731          | 867                 |
| <i>Xiphophorus maculatus</i> | southern platyfish | Cyprinodontiformes | endothelial PAS domain protein 1a                | HIF2Ab    | epas1, epas1a | 102227739         | 10           | 9     | XM_005794777       | XP_005794834          | 409                 |
| <i>Xiphophorus maculatus</i> | southern platyfish | Cyprinodontiformes | hypoxia inducible factor 1 subunit alpha, like   | HIF3A     | hif3a, hif1a2 | 102223582         | 18           | 15    | XM_005811977       | XP_005811204          | 650                 |



| Gene Group | Fish Group    | Count | Exons<br>(MIN) | Exons<br>(MAX) | Exons<br>(MEDIAN) | Amino Acids<br>(MIN) | Amino Acids<br>(MAX) | Amino Acids<br>(MEDIAN) |
|------------|---------------|-------|----------------|----------------|-------------------|----------------------|----------------------|-------------------------|
| HIF1Aa     | Asian arowana | 1     | 15             | 15             | 15                | 762                  | 762                  | 762                     |
| HIF1Aa     | Otocephala    | 5     | 14             | 15             | 15                | 611                  | 748                  | 717                     |
| HIF1Aa_s1  | Salmoniformes | 5     | 14             | 15             | 14                | 756                  | 766                  | 762                     |
| HIF1Aa_s2  | Salmoniformes | 5     | 15             | 16             | 15                | 758                  | 802                  | 768                     |
| HIF1Aa     | Neoteleostei  | 9     | 15             | 16             | 15                | 748                  | 774                  | 758                     |
| HIF1Ab     | Otocephala    | 5     | 14             | 16             | 15                | 774                  | 798                  | 777                     |
| HIF2Aa     | Asian arowana | 1     | 18             | 18             | 18                | 881                  | 881                  | 881                     |
| HIF2Aa     | Otocephala    | 5     | 10             | 17             | 16                | 565                  | 912                  | 834                     |
| HIF2Aa_s1  | Salmoniformes | 5     | 16             | 18             | 16                | 852                  | 853                  | 853                     |
| HIF2Aa_s2  | Salmoniformes | 5     | 13             | 17             | 16                | 845                  | 854                  | 849                     |
| HIF2Aa     | Neoteleostei  | 9     | 9              | 18             | 16                | 557                  | 881                  | 860                     |
| HIF2Ab     | Otocephala    | 5     | 10             | 17             | 16                | 459                  | 845                  | 816                     |
| HIF2Ab     | Salmoniformes | 2     | 5              | 9              | 7                 | 232                  | 391                  | 312                     |
| HIF2Ab     | Neoteleostei  | 8     | 8              | 9              | 9                 | 359                  | 409                  | 370                     |
| HIF3A      | Asian arowana | 1     | 19             | 19             | 19                | 628                  | 628                  | 628                     |
| HIF3A      | Otocephala    | 5     | 15             | 17             | 15                | 626                  | 646                  | 633                     |
| HIF3A_s1   | Salmoniformes | 5     | 14             | 16             | 15                | 572                  | 676                  | 628                     |
| HIF3A_s2   | Salmoniformes | 4     | 14             | 16             | 15                | 630                  | 659                  | 632                     |
| HIF3A      | Neoteleostei  | 9     | 12             | 16             | 15                | 649                  | 679                  | 662                     |
| HIF4A      | Asian arowana | 1     | 15             | 15             | 15                | 711                  | 711                  | 711                     |
| HIF4A      | Otocephala    | 5     | 14             | 15             | 14                | 606                  | 708                  | 663                     |
| HIF4A      | Salmoniformes | 5     | 12             | 13             | 12                | 721                  | 725                  | 724                     |
